# Supplementary material
Source: PubMed Central journal article supplement (PMC4429734)
Supplement: mt2014142x1.pdf [file mt2014142x1.pdf]

## Supplemental Figures

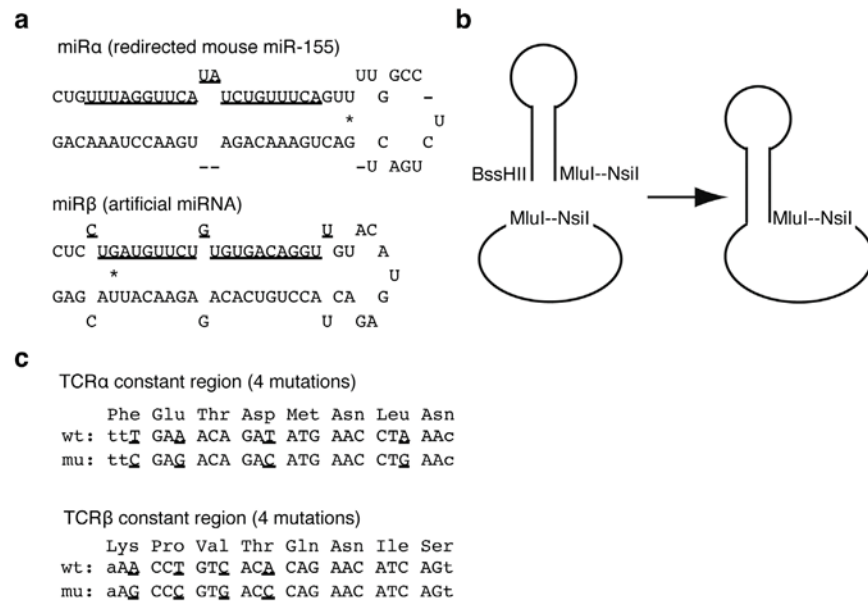

**Supplementary Figure S1: Molecular construction of the miRNA vectors for TCR silencing.** (a) Displayed are the central hairpins of the miRNAs targeting the endogenous TCR constant (C) regions. Redirected mouse miR-155 was used to target the TCR α chain (miRa) and an artificial miRNA was used to target the TCR β chain (miRβ). The antisense sequences are underlined. miRNAs were constructed by overlapping PCR using synthesized DNA and mouse genomic DNA. (b) miRNAs encode the three indicated restriction sites, so that the insert after being cloned into the vector provides the restriction sites for the next miRNA integration. (c) Four silent mutations at the RNAi target sites in the TCR C regions were introduced to protect the transferred TCR from the RNAi effect. Codon changes were identical to those in the codon-optimized TCR constant regions.
