# Supplementary material
Source: PubMed Central journal article supplement (PMC4429734)
Supplement: mt2014142x2.pdf [file mt2014142x2.pdf]

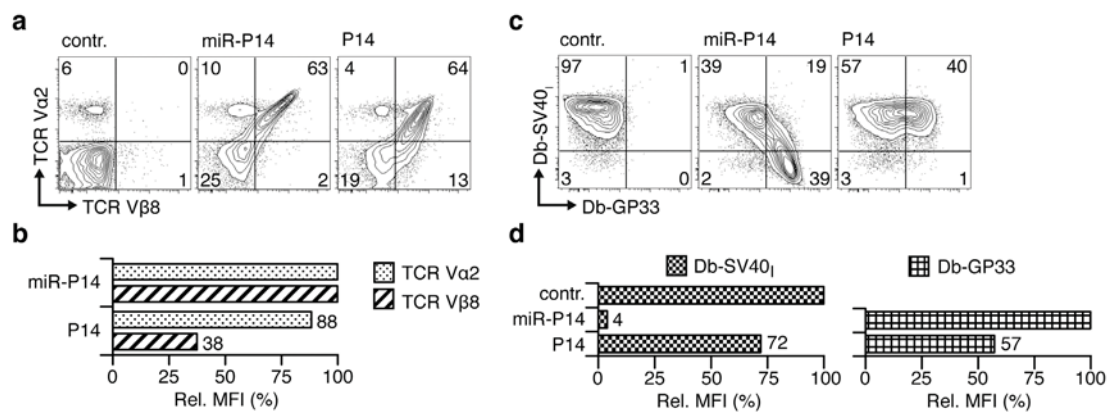

**Supplementary Figure S2: TCR I-transgenic T cells transduced with the miR-P14 vector lose their ability to bind TCR I-specific MHC multimers.** (a) The P14 TCR  $\alpha$  chain (TCR Va2) and P14 TCR  $\beta$  chain (TCR V $\beta$ 8) surface levels of transduced SV40<sub>I</sub>-specific TCR I-transgenic T cells were determined by flow cytometry. Nontransduced T cells served as a control (contr.). The percentage of gated cells is indicated. (b) MFIs of the transduced cells expressing the P14 TCR without the miRNAs were compared to cells transduced with the miRNA vector. (c) The cells were stained with a TCR I-specific (Db-SV40<sub>I</sub>) and with a P14 TCR-specific (Db-GP33) MHC multimer. (d) The MHC multimer staining of the endogenous SV40<sub>I</sub>-specific TCR was analyzed by comparing the transduced cells to the nontransduced control. The MHC multimer staining of the transferred P14 TCR was analyzed by comparing the miR-P14 vector-transduced cells with the P14 vector-transduced cells. Representative results of one out of two independent experiments are shown.
