# Supplementary material
Source: PubMed Central journal article supplement (PMC4429734)
Supplement: mt2014142x3.pdf [file mt2014142x3.pdf]

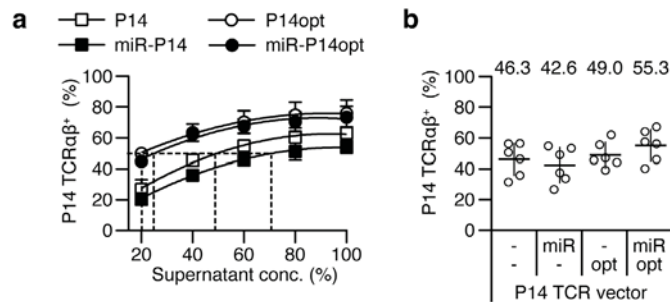

**Supplementary Figure S3: Viral supernatants were titrated to achieve comparable transduction efficiencies.** (a) Polyclonal T cells were transduced with diluted viral supernatant and transduction (Td) efficiencies were determined as percentage of CD8<sup>+</sup>/P14 TCRαβ<sup>+</sup> T cells four days after Td. Dotted lines indicate the concentration required to achieve Td efficiency of 50%: P14 (50%), miR-P14 (70%), P14opt (20%), miR-P14opt (25%). Plot shows the mean ±SD of three independent experiments (*n*=3). (b) Td efficiencies of the cells shown in Fig. 3b-d. Viral supernatants equilibrated in titer were used for Td. Plot shows data of six independent experiments (*n*=6). Horizontal bar (group mean, indicated on top). Vertical bar (SD).
