# Supplementary material
Source: PubMed Central journal article supplement (PMC4429734)
Supplement: mt2014142x5.pdf [file mt2014142x5.pdf]

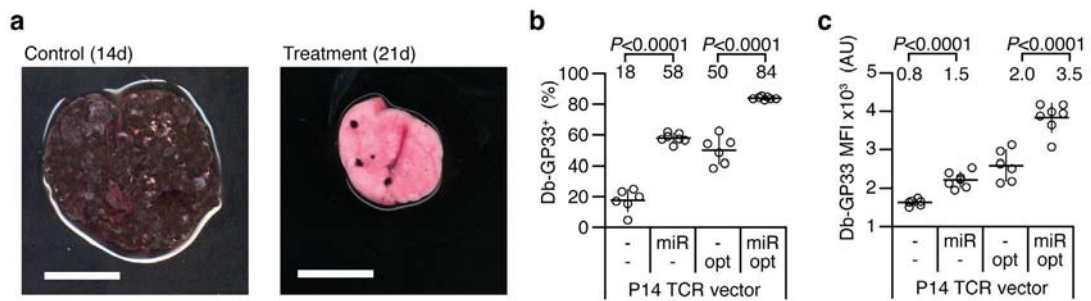

**Supplementary Figure S5: Suppression of experimental pulmonary metastasis and antigen-driven proliferation.** (a) Representative lungs of the control group and the treatment group 14 days and 21 days after adoptive T cell transfer (ATT), respectively. Scale bar: 1 cm. (b, c) At day 14 after ATT blood samples of the mice were stained for CD8, CD45.1 and with a P14 TCR-specific Db-GP33 multimer. Symbols represent individual mice. Horizontal bar (group mean, indicated on top). Vertical bar (SD). Group sizes: P14 ( $n=6$ ), miR-P14 ( $n=7$ ), P14opt ( $n=6$ ), miR-P14opt ( $n=7$ ), control ( $n=5$ ).
