# Supplementary material
Source: PubMed Central journal article supplement (PMC4429734)
Supplement: mt2014142x6.pdf [file mt2014142x6.pdf]

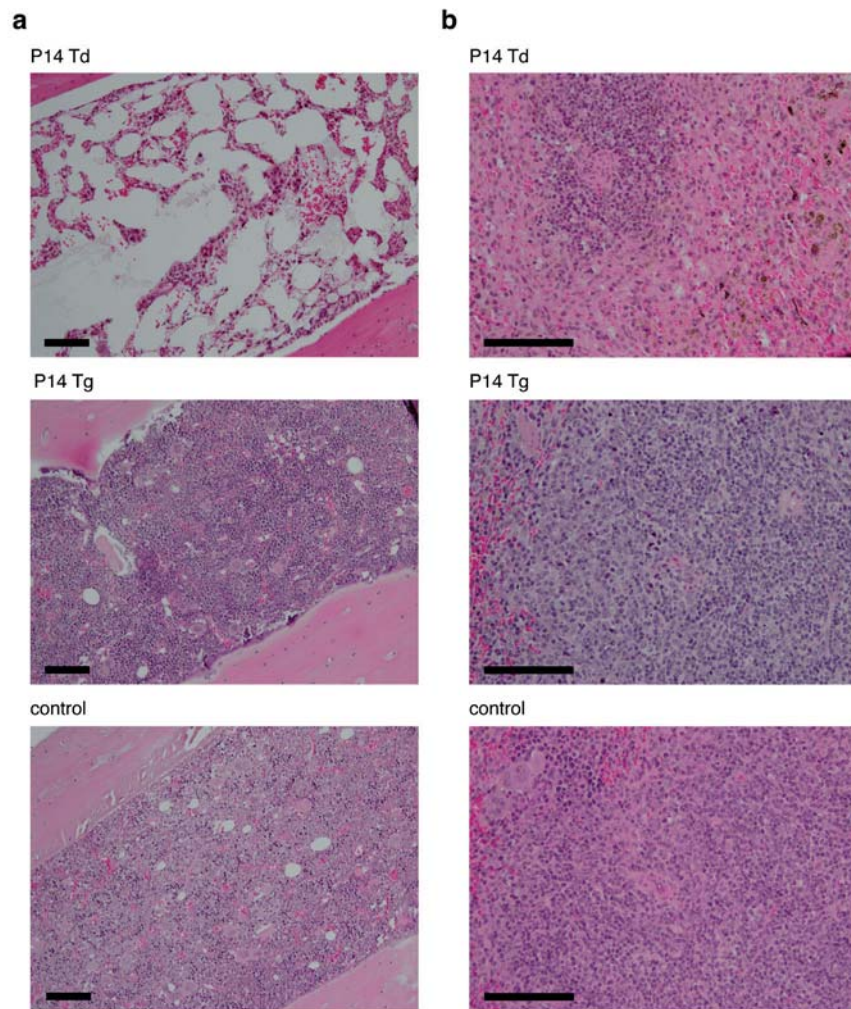

**Supplementary Figure S6: Disappearance of hematopoietic cells in the bone marrow and reduction of lymphocytes in the spleen caused by TI-GVHD.** (a, b) Representative bone marrow and spleen sections of irradiated mice (5 Gy) that received either P14 vector-transduced T cells (P14 Td), P14 TCR-transgenic T cells (P14 Tg) or nontransduced T cells (control). 10 day after adoptive T cell transfer (ATT), all mice were treated with IL-2 for three days. Femur and spleen were collected either at the time point when the mice had to be sacrificed because of TI-GVHD (P14 Td) or 40 days after ATT (P14 Tg, control) (Fig. 5a). Sections of formalin-fixed and paraffin-embedded tissue were stained with H&E. Bone marrow sections in **a** demonstrate the disappearance of hematopoietic cells in recipients of P14 vector-transduced T cells (P14 Td). Spleen sections in **b** demonstrate that also the periarteriolar lymphatic sheaths (PALS) are significantly reduced in mice of this group (P14 Td). Samples of four mice from each group were analyzed. The scale bars in **a** and **b** represent 100  $\mu$ M.
